# Supplementary material
Source: PubMed Central journal article supplement (PMC7094714)
Supplement: 41429_2012_BFja201267_MOESM268_ESM.pdf [file 41429_2012_BFja201267_MOESM268_ESM.pdf]

## Supplemental Material

Table 1. Effect of geldanamycin derivatives<sup>ref.19</sup> on HSV-2 and cell toxicity in Vero cells.

| Compounds     | CC <sub>50</sub> (μmol/L) <sup>a</sup> | IC <sub>50</sub> (μmol/L) <sup>b</sup> | SI <sup>c</sup> |
|---------------|----------------------------------------|----------------------------------------|-----------------|
| <b>1 (GA)</b> | 23.13                                  | 0.60                                   | 38.6            |
| <b>2a</b>     | 33.66                                  | 5.14                                   | 6.5             |
| <b>2b</b>     | 34.16                                  | 2.59                                   | 13.2            |
| <b>2c</b>     | 25.50                                  | 2.15                                   | 11.9            |
| <b>2d</b>     | 27.43                                  | 2.45                                   | 11.2            |
| <b>2e</b>     | 34.04                                  | 1.15                                   | 29.6            |
| <b>2f</b>     | 114.20                                 | 2.09                                   | 54.6            |
| <b>2g</b>     | 18.07                                  | 2.21                                   | 8.2             |
| <b>2h</b>     | 32.62                                  | 1.79                                   | 18.2            |
| <b>2i</b>     | 26.27                                  | 3.57                                   | 7.4             |
| <b>2j</b>     | 33.93                                  | 8.02                                   | 4.2             |
| <b>2k</b>     | 22.57                                  | >10.43                                 | -               |
| <b>2l</b>     | 37.28                                  | >10.68                                 | -               |
| <b>3</b>      | >286.41                                | >286.41                                | -               |
| ACV           | >2220.15                               | 112.67                                 | >19.7           |

<sup>a</sup> 72 hours after treatment, cell toxicity were determined by CPE.

<sup>b</sup> Antiviral activity were determined by CPE.

<sup>c</sup> SI= CC<sub>50</sub>/IC<sub>50</sub>

ACV (Acyclovir) were used as positive controls.

Unless otherwise noted, the values represent average ± standard deviation from two separated experiments.

### SAR analysis

By examination of the relationships between the structure and the anti-HSV-2 activity of the tested compounds, some general conclusions can be drawn as follows:

1. The antiviral activity against HSV-2 of 17-substituted GA derivatives decreased compared with GA. And the toxicity of these compounds also decreased slightly.
2. Non-cyclic side chain modification could significantly reduce the toxicity.
3. The 17- and 19- bis-substituted derivative lost antiviral activity.
4. The antiviral activity also affected by the 17-substituted group long chain or large volume of space.
5. Introduction of hetero-atom to the 17-substituted cyclic groups was better for antiviral activity.
6. Chirality of 17-substituted side chain could influence the antiviral activity.
